# Supplementary material for: Two dimensional ZIF-derived ultra-thin Cu–N/C nanosheets as high performance oxygen reduction electrocatalysts for high-performance Zn–air batteries
Source: Royal Society of Chemistry journal article supplement (doi:10.1039/d0nr03495a), 2020-01-01
Supplement: d0nr03495a1.pdf [file d0nr03495a1.pdf]

# Two Dimension ZIF-derived Ultra-thin Cu-N/C Nanosheets as High-Performance Oxygen Reduction Electrocatalysts for High-Performance Zn-Air Batteries

*Yi Guan, Nan Li, Yongliang Li\*, Lingna Sun, Yuan Gao\*, Qianling Zhang, Chuanxin*

*He, Jianhong Liu, Xiangzhong Ren\**

Department of College of Chemistry and Environmental Engineering, Shenzhen

University, Shenzhen, Guangdong 518060, P.R. China

\*Corresponding author.

E-mail address: renxz@szu.edu.cn; liyli@szu.edu.cn; szgaoy311@163.com

## Synthesis of ZIF-PHS

Cu/Zn ZIF-UNS was synthesized as follows:  $\text{Zn}(\text{Ac})_2$  and  $\text{Cu}(\text{NO}_3)_2 \cdot 3\text{H}_2\text{O}$  were dissolved in 40 mL of deionized water with the molar ratios of  $\text{Zn}^{2+}/\text{Co}^{2+} = 2:1$ , denoted as solution A. The 2-mIm and PVP was added to the same amount of deionized water denoted as solution B. Solution A and solution B are mixed and placed in a 60 ° water bath for 3 h with vigorously stirring. The reacted solution was then stirred at room temperature for 12 h. The detailed amount of metal salt and the corresponding ZIF-UNS products are listed in Table S1. The product was collected by

repeated centrifugation (8000 rpm, 15 min) and washed with deionized water for 4 times, and then dried in an oven at 60 °C overnight.

**Table S1.** The relationship diagram of the amounts of metal salt and the obtained products.

| Cu(NO <sub>3</sub> ) <sub>2</sub> ·3H <sub>2</sub> O(mmol) | Zn(Ac) <sub>2</sub> (mmol) | 2-mIm(mmol) | PVP(g) | The product  |
|------------------------------------------------------------|----------------------------|-------------|--------|--------------|
| 2                                                          | 4                          | 16          | 0.5    | Cu-N-UNS-1:2 |
| 3                                                          | 3                          | 16          | 0.5    | Cu-N-UNS-1:1 |
| 4                                                          | 2                          | 16          | 0.5    | Cu-N-UNS-2:1 |
| 5                                                          | 1                          | 16          | 0.5    | Cu-N-UNS-5:1 |

### Synthesis of Cu/Zn ZIF-UNS-L

Zn(Ac)<sub>2</sub> and Cu(NO<sub>3</sub>)<sub>2</sub>·3H<sub>2</sub>O were dissolved in 40 mL of deionized water with the molar ratios of Zn<sup>2+</sup>/Co<sup>2+</sup> = 2:1, denoted as solution A. The 2-mIm and PVP was added to the same amount of deionized water denoted as solution B. Solution A and solution B are mixed and stirred at room temperature for 15 h. The product was collected by repeated centrifugation (8000 rpm, 15 min) and washed with deionized water for 4 times, and then dried in an oven at 60 °C overnight.

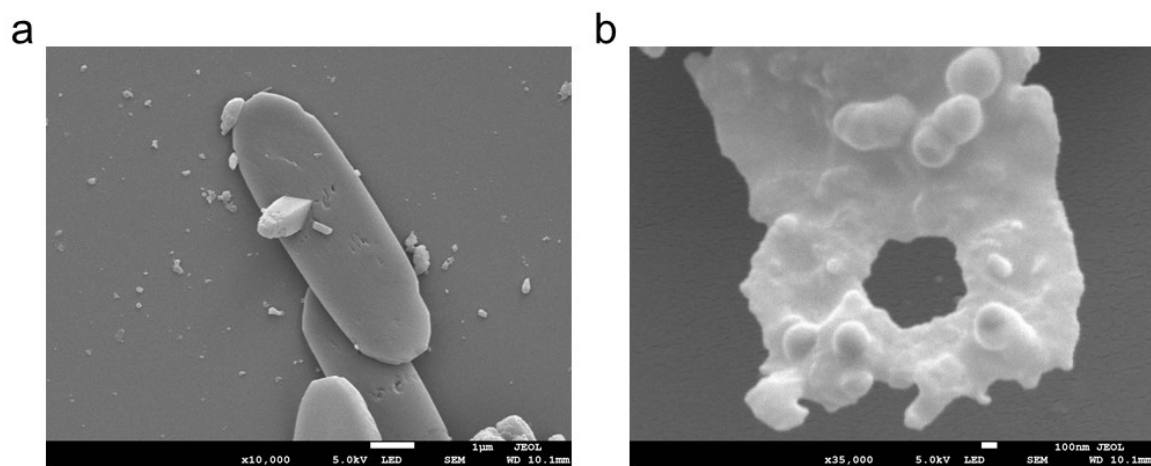

**Fig. S1.** SEM images of the (a) Cu/Zn ZIF-UNS-L and its product Cu/N-UNS (b).

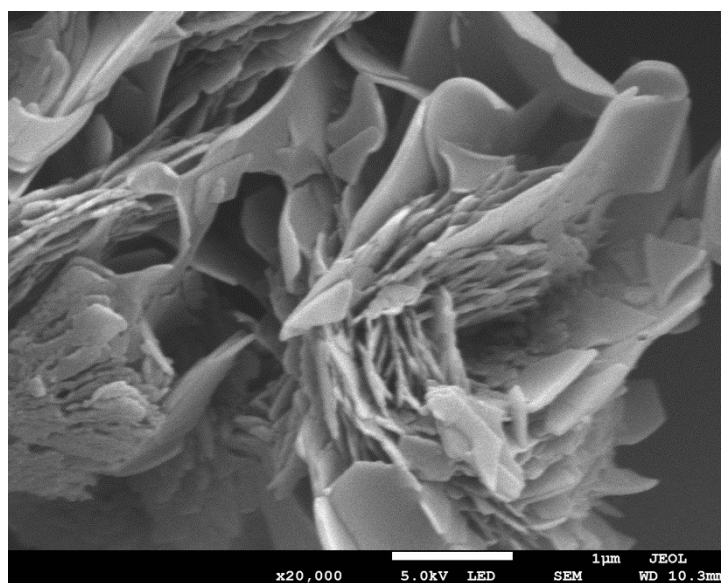

**Fig. S2.** SEM image of Cu/Zn ZIF-UNS after 3 hours water bath

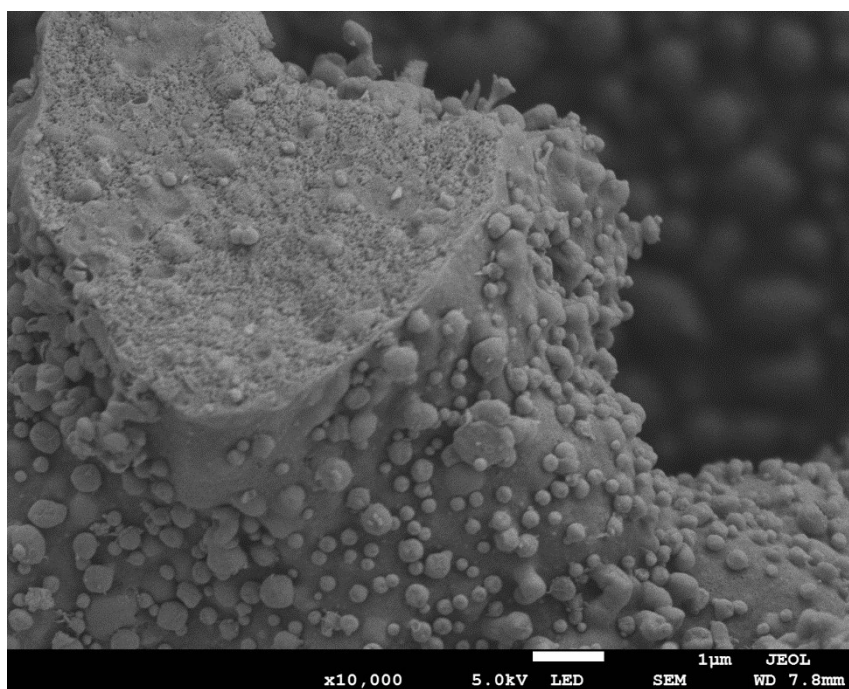

**Fig. S3.** SEM image of Cu-N-UNS-5:1.

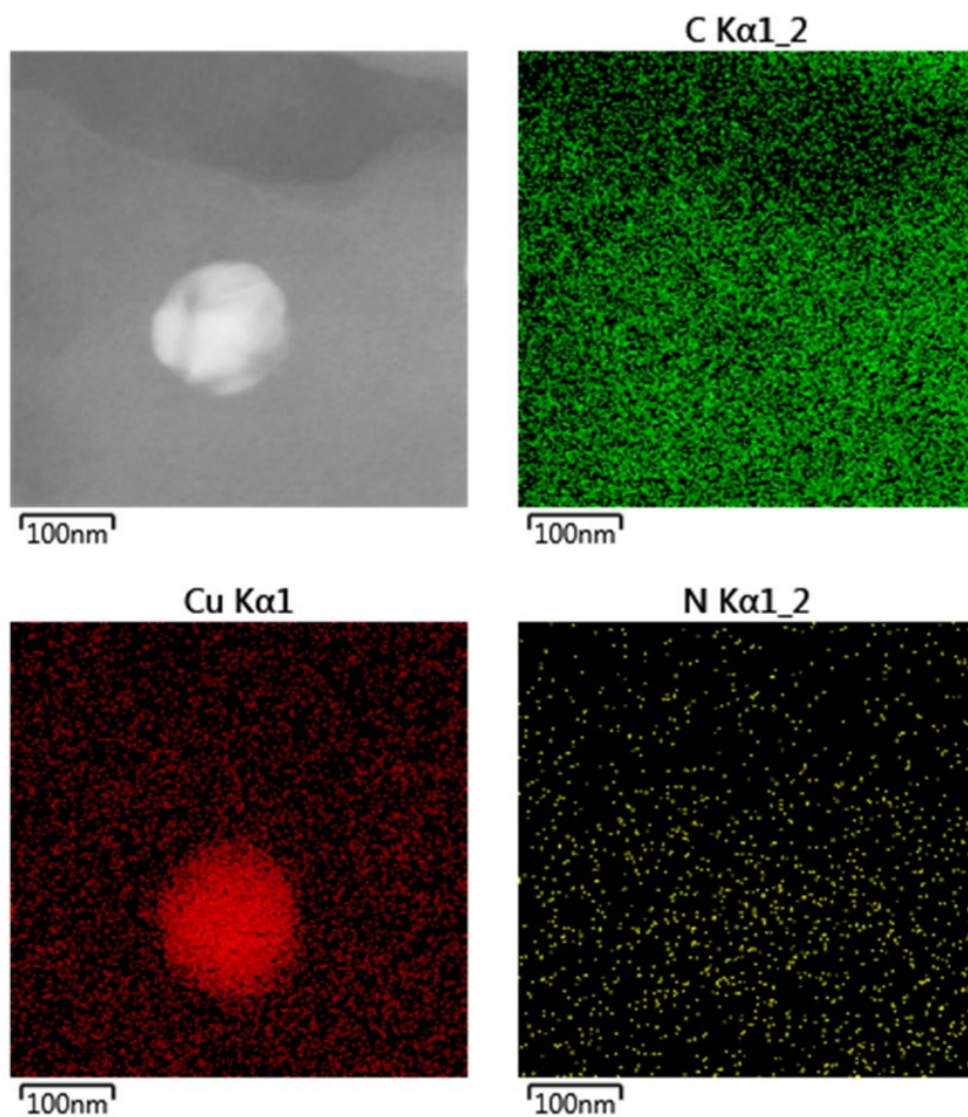

**Fig. S4.** TEM image and EDS mapping of Cu-N-UNS-2:1 showing Cu nanoparticles evenly distributed in the ultra-thin carbon micro-sheets.

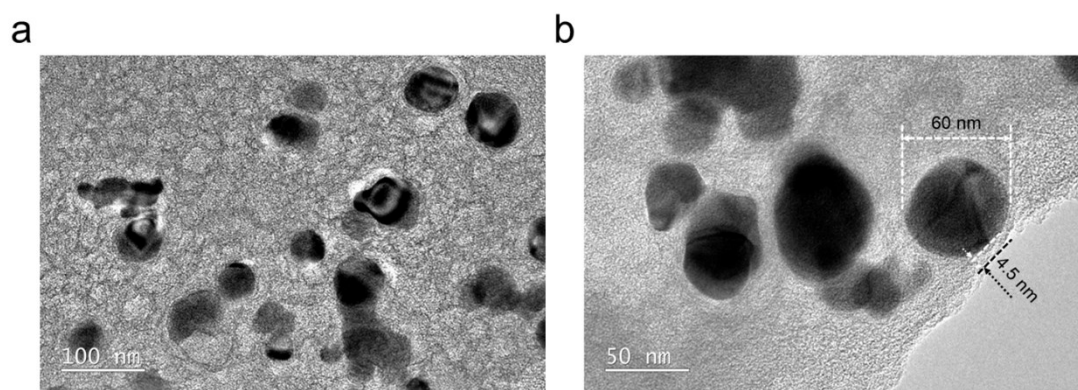

**Fig. S5.** TEM images of Cu-N-UNS-1:1.

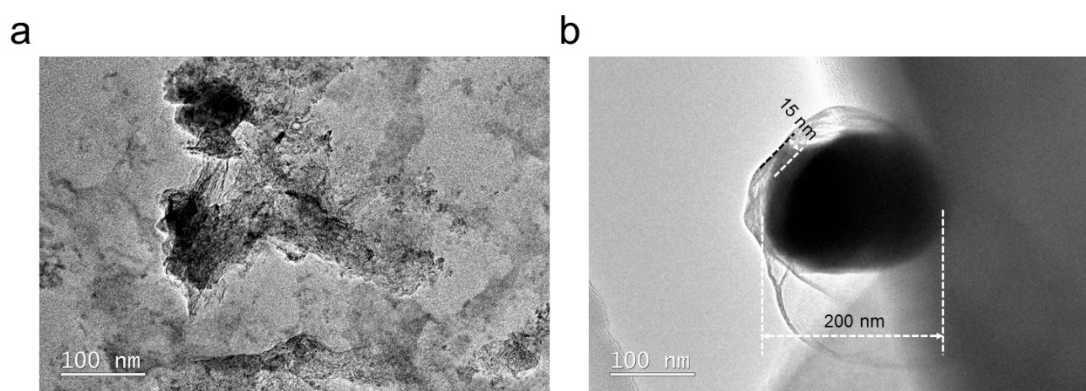

**Fig. S6.** TEM images of Cu-N-UNS-1:2.

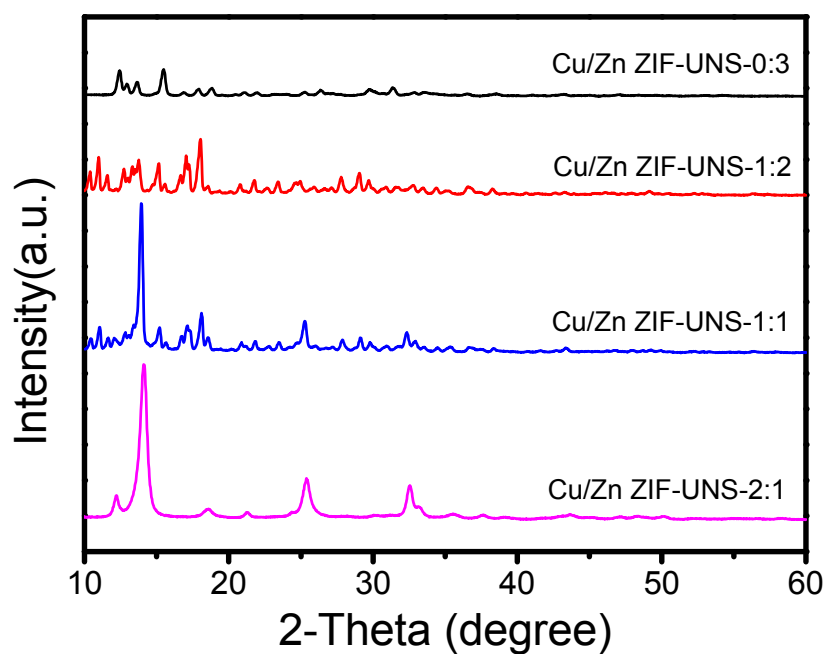

**Fig. S7.** XRD patterns of Cu/Zn ZIF-UNS samples.

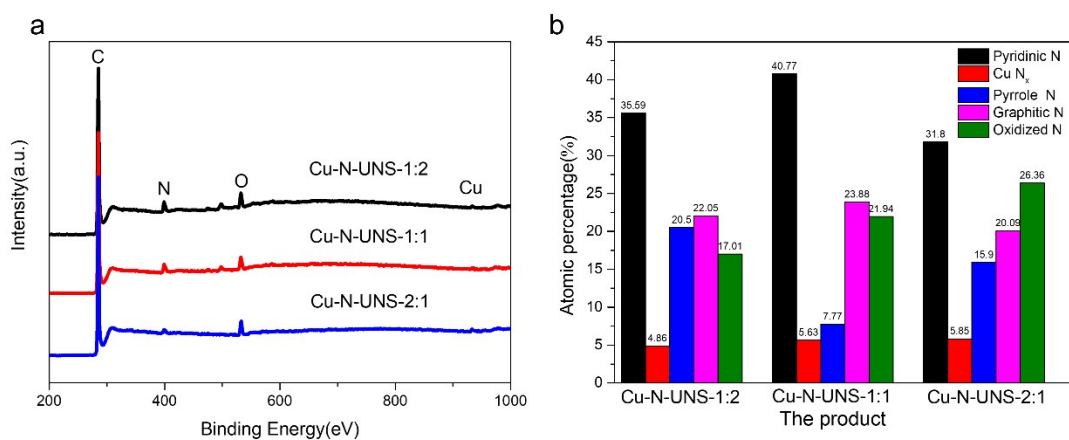

**Fig. S8.** XPS spectra (a) of different products derived from various precursors; and elemental composition (b) (atomic percentage) obtained from XPS analysis.

**Table S2.** Atomic ratios of Cu:N:C of the catalysts obtained from XPS analysis

| Catalyst     | Atomic % |      |     |      |
|--------------|----------|------|-----|------|
|              | Cu       | C    | N   | O    |
| Cu-N-UNS-1:2 | 0.14     | 89.5 | 5.8 | 4.56 |
| Cu-N-UNS-1:1 | 0.17     | 90.2 | 5.2 | 4.43 |
| Cu-N-UNS-2:1 | 0.2      | 92.4 | 4.8 | 2.6  |

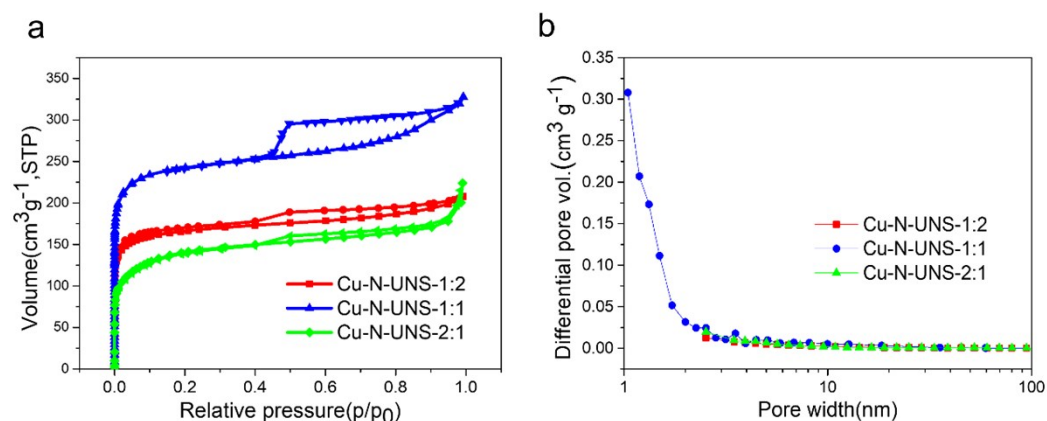

**Fig. S9.** (a) N<sub>2</sub> adsorption/desorption isotherms and (b) pore size distributions.

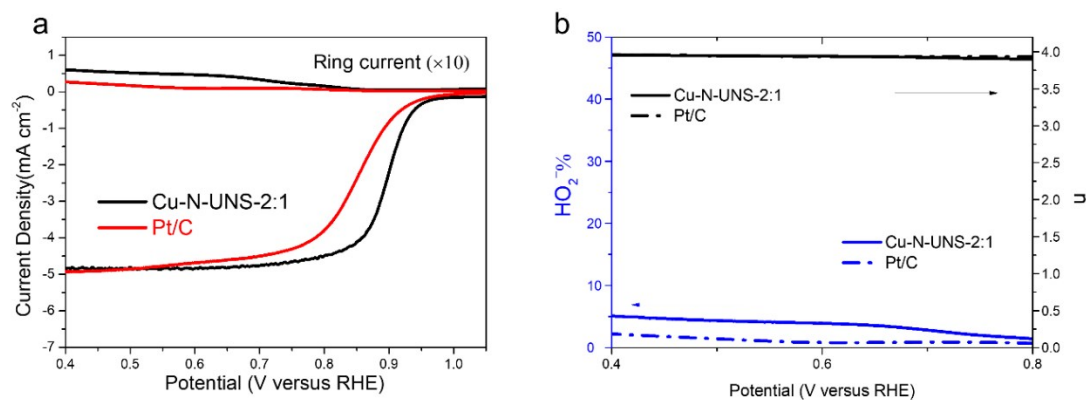

**Fig. S10.** The high diffusion-limited current densities and low ring current densities (×10) of Cu-N-UNS-2:1 and Pt/C (a). Percentage of peroxide in the total oxygen reduction products and the number of electron transfer (b) at the Cu-N-UNS-2:1 and Pt/C electrodes based on the RRDE result.



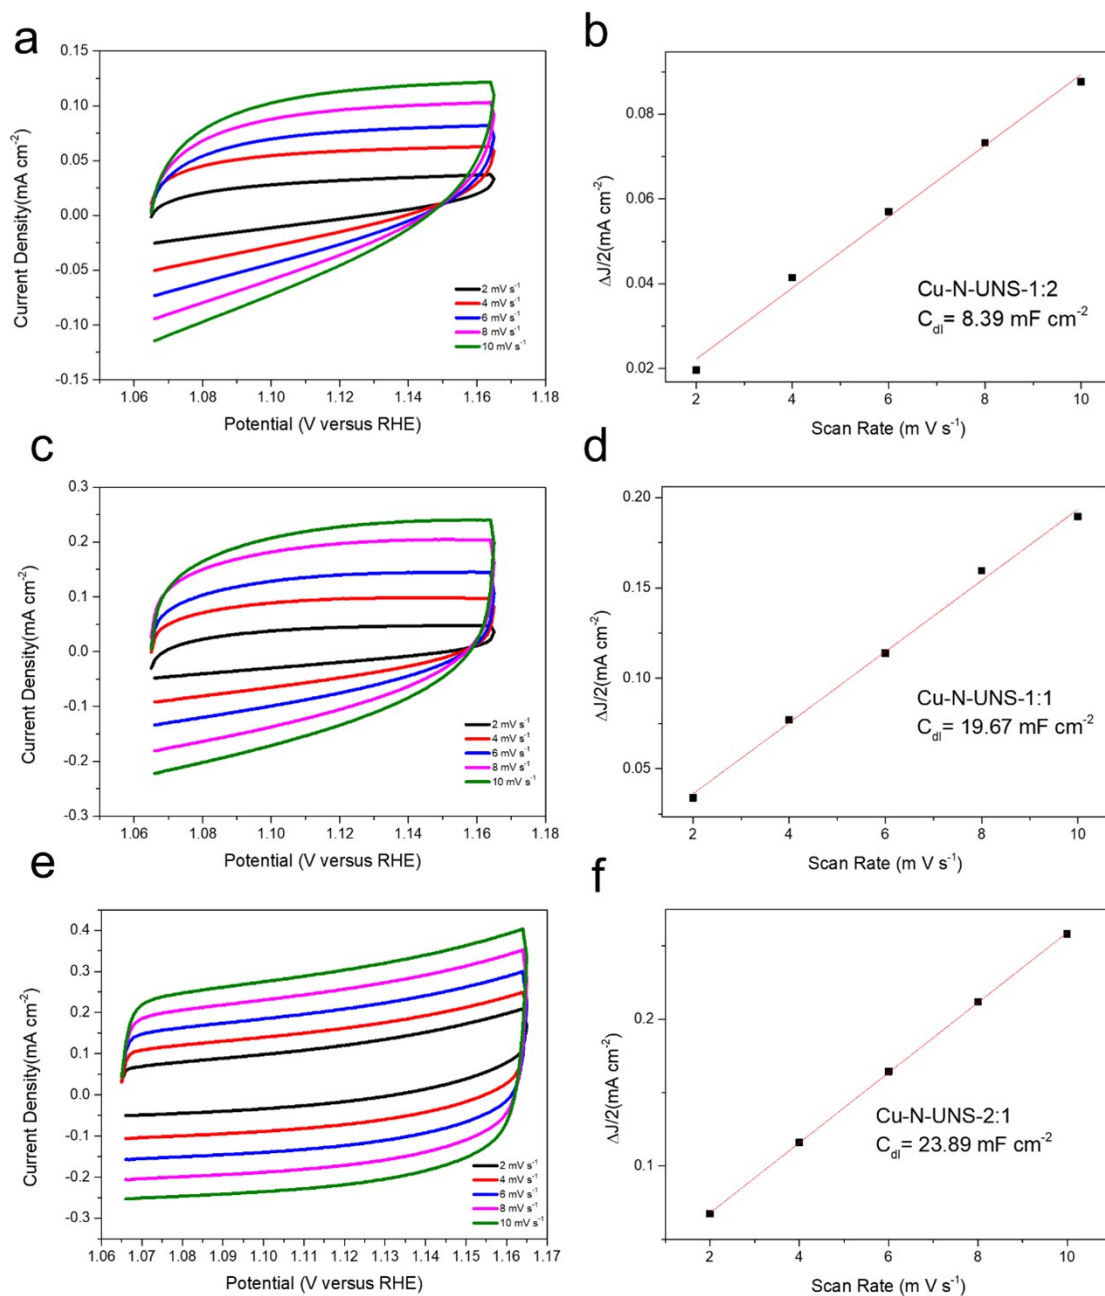

**Fig. S11.** Cyclic voltammograms in the region of 1.065-1.165 V vs. RHE at various scan rates and the corresponding linear fitting of the capacitive currents vs. scan rates to estimate the  $C_{dl}$ . (a) and (b) for Cu-N-UNS-1:2; (c) and (d) for Cu-N-UNS-1:1; (e) and (f) for Cu-N-UNS-2:1; (g) and (h) for Cu/N-UNS; (i) and (j) for Pt/C and the calculated  $C_{dl}$  values are shown in the insets.

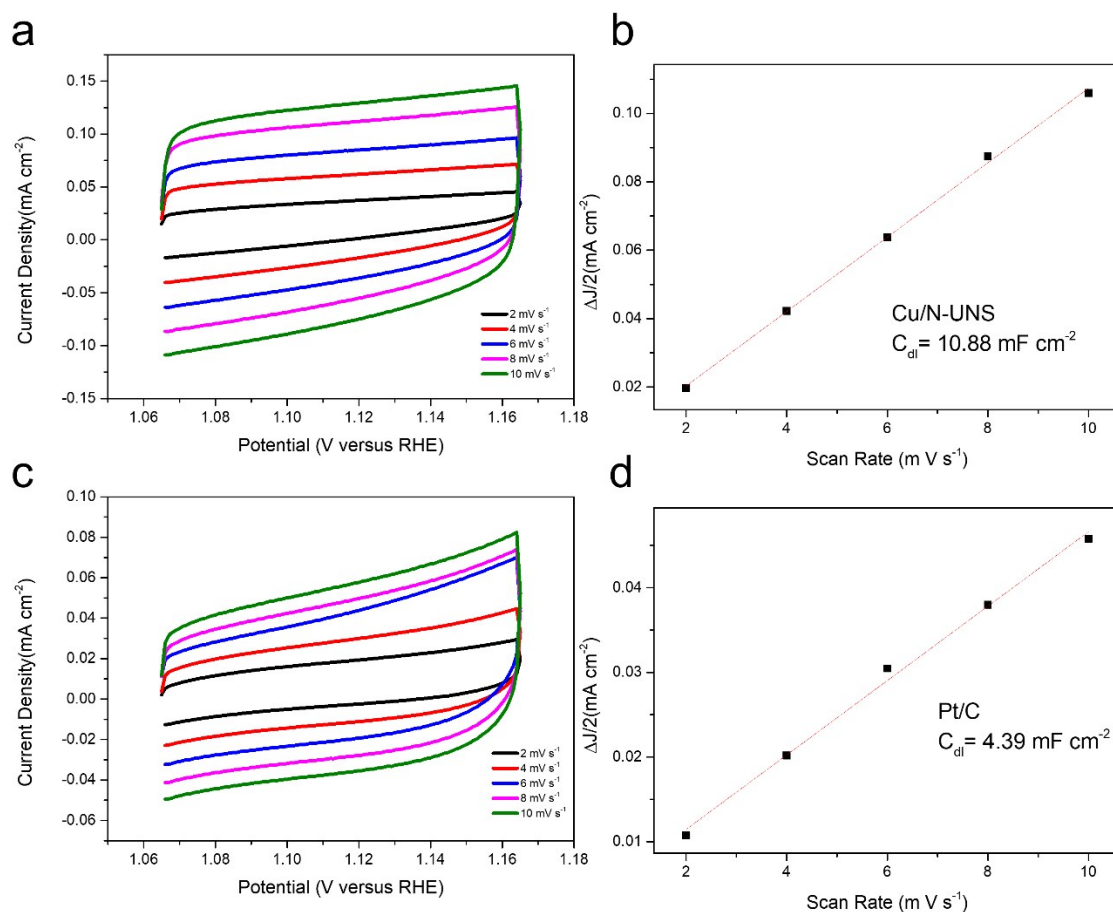

**Fig. S12.** Cyclic voltammograms in the region of 1.065-1.135 V vs. RHE at various scan rates and the corresponding linear fitting of the capacitive currents vs. scan rates to estimate the  $C_{dl}$ . (a) and (b) for Cu/N-UNS; (c) and (d) for Pt/C and the calculated  $C_{dl}$  values are shown in the insets.

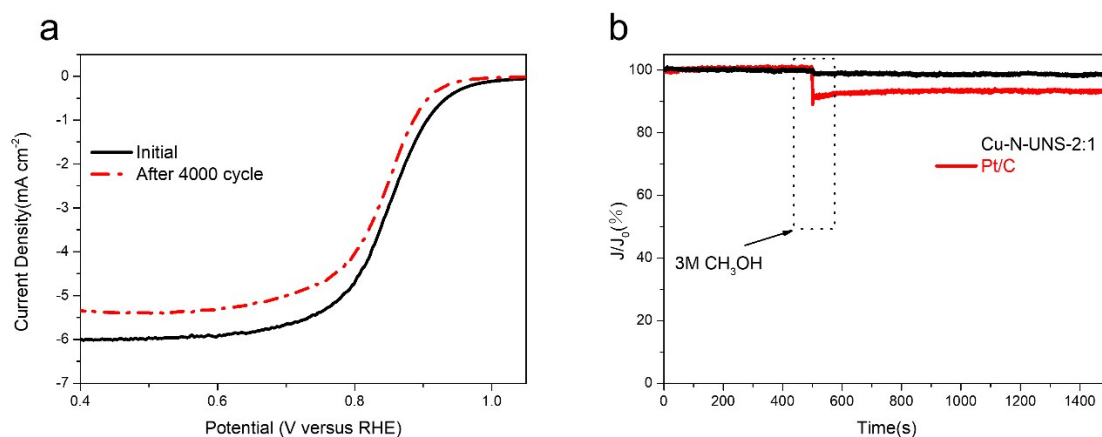

**Fig. S13.** (a) Pt/C before and after 4000 potential cycles at a potential range of 1.2–1.8 V versus RHE and a sweep speed of 100 mV s<sup>-1</sup>; (b) Chronoamperometric response at 0.8 V after the introduction of 3M methanol into 65 ml of 0.1 M KOH solution for Cu-N-UNS-2:1 and Pt/C, respectively.

**Table S3.** Activities for ORR of as-prepared catalysts and Pt/C

| Catalyst     | $E_{\text{onset}}(\text{V})$ | $E_{1/2}(\text{V})$ | $J_k \text{ at } 0.85\text{V}(\text{mA cm}^{-2})$ |
|--------------|------------------------------|---------------------|---------------------------------------------------|
| Cu-N-UNS-1:2 | 0.92                         | 0.792               | 0.09544                                           |
| Cu-N-UNS-1:1 | 0.921                        | 0.81                | 1.023                                             |
| Cu-N-UNS-2:1 | 0.987                        | 0.898               | 28.86                                             |
| Cu/N-UNS     | 0.92                         | 0.811               | 0.924                                             |
| Pt/C         | 1.003                        | 0.85                | 5.04                                              |

**Table S4.** A survey of the catalytic performances of various ORR electrocatalysts from recent literatures.

| Literature                                        | Catalyst                                | ORR                            |                       |
|---------------------------------------------------|-----------------------------------------|--------------------------------|-----------------------|
|                                                   |                                         | $E_{\text{onset}}$ (V vs. RHE) | $E_{1/2}$ (V vs. RHE) |
| <b>This work</b>                                  | <b>Cu-N-UNS-2:1</b>                     | <b>0.987</b>                   | <b>0.898</b>          |
| ACS Nano, 2019, DOI: 10.1021/acsnano.8b08692.     | Cu-N-C                                  | /                              | 0.84                  |
| Nature Catalysis, 2018, 1, 781–786.               | Cu SAs/N-C                              | /                              | 0.895                 |
| Small, 2017, 13, 1700740.                         | 25% Cu-N/C                              | 0.914                          | 0.813                 |
| Adv. Energy Mater. 2018, 1802263                  | CoIn <sub>2</sub> S <sub>4</sub> /S-rGO | 0.93                           | 0.82                  |
| ACS Appl Mater Interfaces, 2016, 8, 21431-21439.  | Cu-N-C                                  | /                              | –0.156 V vs (SCE)     |
| Adv. Energy Mater. 2018, 8, 1701642               | CoS <sub>x</sub> @PCN/rGO               | 0.89                           | 0.78                  |
| J. Mater. Chem. A, 2019, DOI: 10.1039/c9ta01953g. | Fe-N-C-800                              | /                              | 0.883                 |
| Adv. Energy Mater. 2018, 1801495                  | rGO/CB <sub>2</sub> /Co-Bi              | 0.88                           | 0.7                   |
| Adv. Energy Mater.                                | DN-CP@G                                 | N/A                            | 0.801                 |

|                     |               |      |      |
|---------------------|---------------|------|------|
| 2018, 1703539       |               |      |      |
| Adv. Mater.         |               |      |      |
|                     | NCNF-1000     | 0.97 | 0.82 |
| 2016, 28, 3000–3006 |               |      |      |
| Adv. Energy Mater.  |               |      |      |
|                     | N-GCNT/FeCo-3 | 1.03 | 0.92 |
| 2017, 7, 1602420    |               |      |      |

**Table S5.** A survey of the performance of primary Zn-air batteries with various electrocatalysts

| Literature                                              | Catalysts                               | Loading<br>(mg cm <sup>-2</sup> ) | Peak power<br>density (mW<br>cm <sup>-2</sup> ) |
|---------------------------------------------------------|-----------------------------------------|-----------------------------------|-------------------------------------------------|
| <b>This work</b>                                        | <b>Cu-N-UNS-2:1</b>                     | <b>1</b>                          | <b>134.7</b>                                    |
| Small, 2017, 13,<br>1700740.                            | 25% Cu-N/C                              | 1                                 | 132                                             |
| Adv. Funct. Mater.<br>2017, 1705048                     | Co-N-CNTs                               | 1                                 | 101                                             |
| J. Mater. Chem. A,<br>2019, DOI:<br>10.1039/c9ta01953g. | Fe-N-C-800                              | 2                                 | 135.3                                           |
| Adv. Energy Mater.<br>2018, 1802263                     | CoIn <sub>2</sub> S <sub>4</sub> /S-rGO | N/A                               | 133                                             |
| Adv. Energy Mater.,                                     | FeCo@MNC                                | 1                                 | 115                                             |

|                    |               |     |      |
|--------------------|---------------|-----|------|
| 2017, 7, 1602420   |               |     |      |
| Adv. Energy Mater. | N-GCNT/FeCo-3 | 2   | 89.3 |
| 2017, 7, 1602420   |               |     |      |
| Adv. Energy Mater. | CoNi@NCNT/NF  | N/A | 127  |
| 2018, 1800480      |               |     |      |
| Adv. Mater. 2018,  | C-MOF-C2-900  | 0.5 | 105  |
| 1705431            |               |     |      |

---
